# Supplementary material for: Clinical and Technical Overview of Preimplantation Genetic Diagnosis for Fragile X Syndrome: Experience at the University Hospital Virgen del Rocio in Spain
Source: PubMed Central journal article supplement (PMC4680048; doi:10.1155/2015/965839), 2015-12-02

# Supp. Figure 1

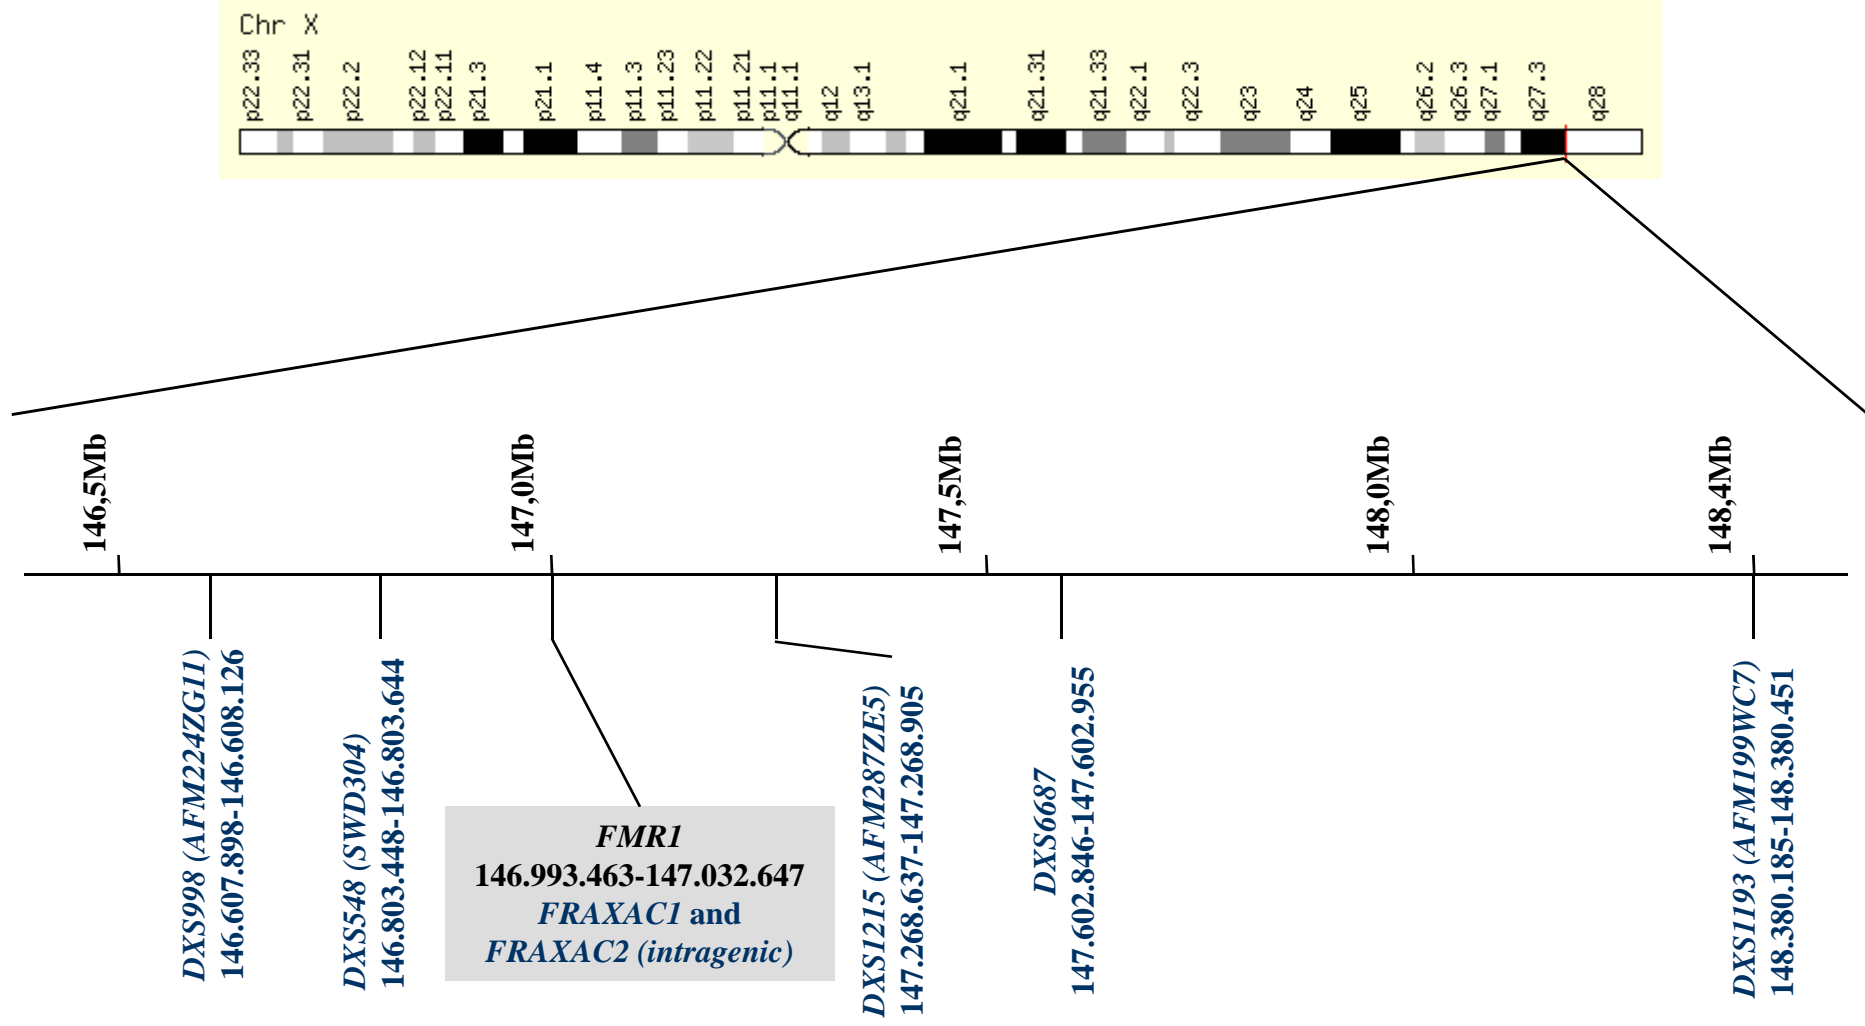

# Supp. Figure 2

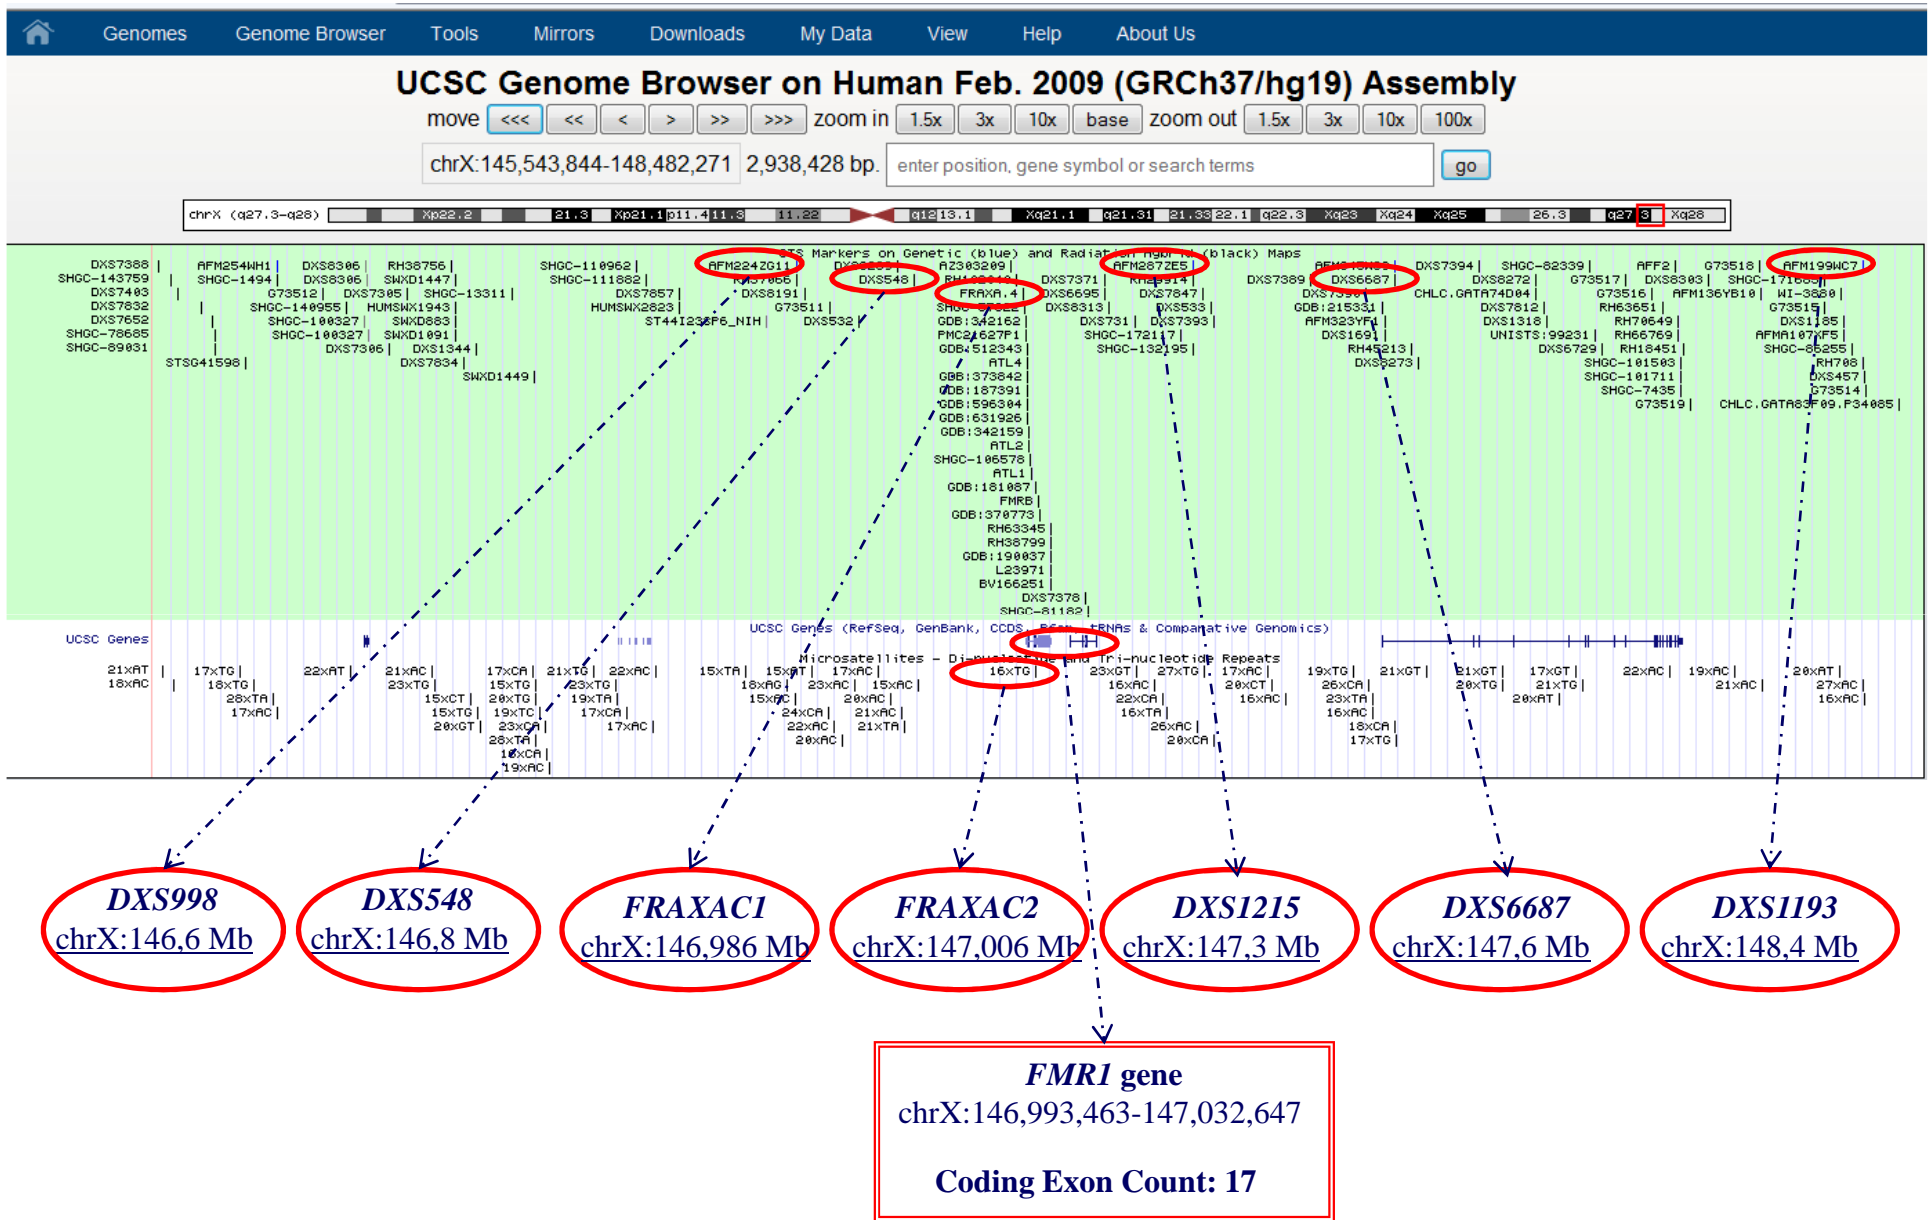

Supplement: 965839.f1.pdf [file 965839.f1.pdf]
